# Supplementary figures and images for: Microfluidic Irreversible Electroporation—A Versatile Tool to Extract Intracellular Contents of Bacteria and Yeast
Source: MDPI journal article supplement (doi:10.3390/metabo9100211), 2019-09-30

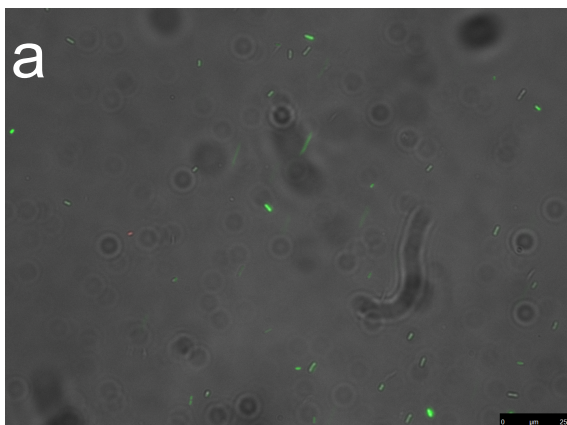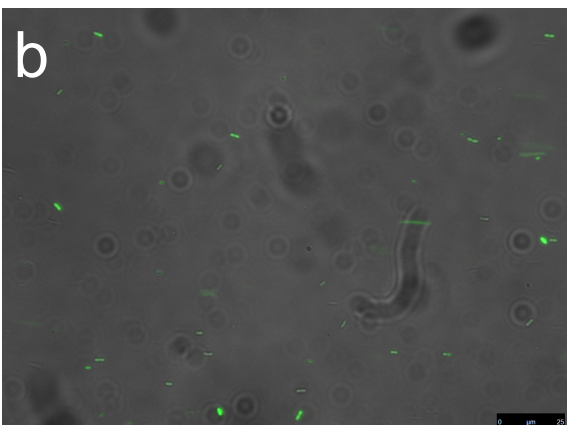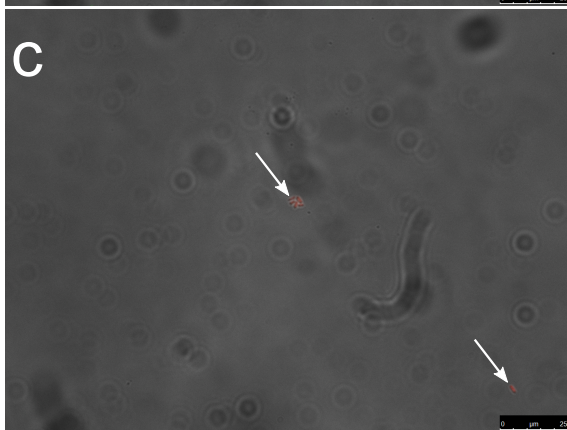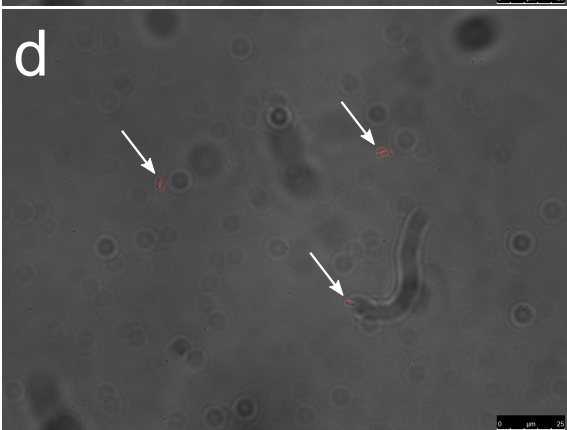

Supplement: s1 [file s1]

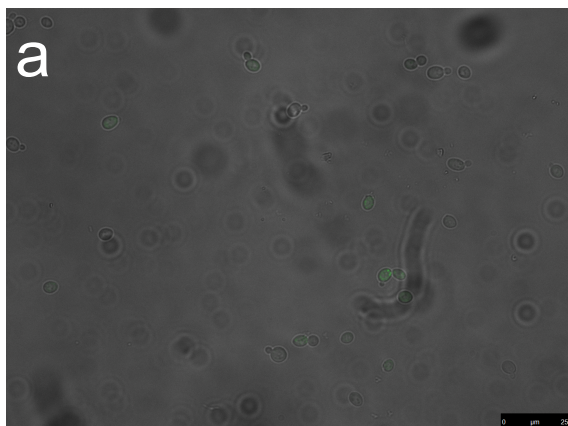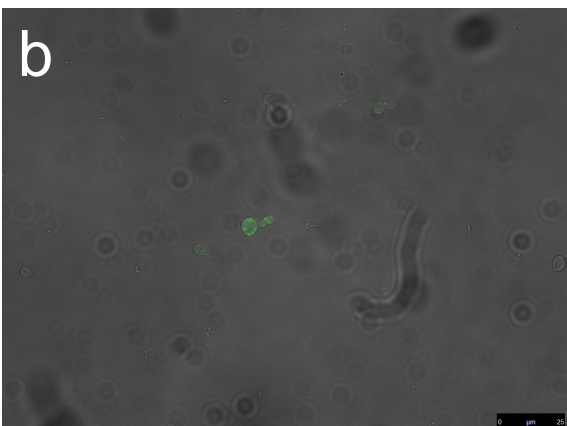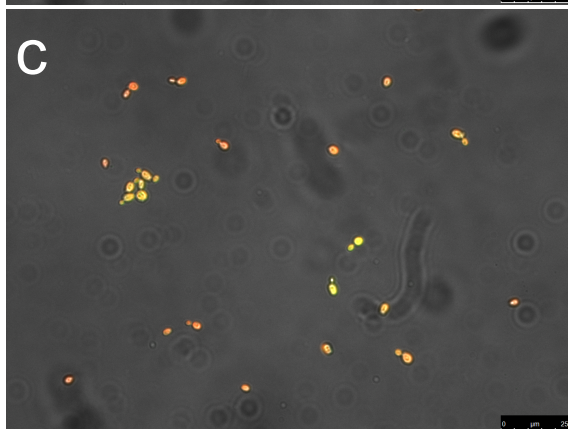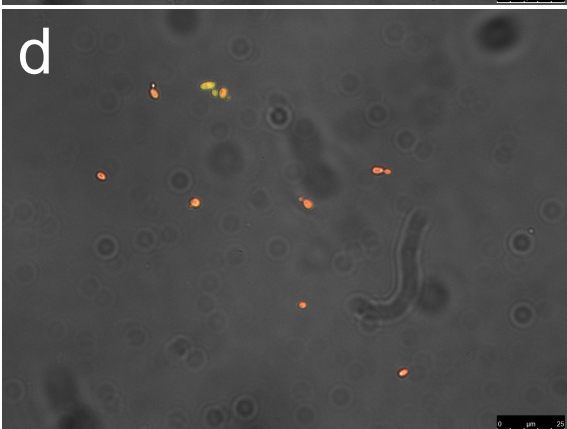

Supplement: s1 [file s1]
